# Supplementary material
Source: PubMed Central journal article supplement (PMC6689428)

## **SUPPORTING INFORMATION**

### **Modulation of antimicrobial potency of human cathelicidin peptides against the ESKAPE pathogens and *in vivo* efficacy in a murine catheter-associated biofilm model**

Jayaram Lakshmaiah Narayana<sup>1</sup>, Biswajit Mishra<sup>1</sup>, Tamara Lushnikova<sup>1</sup>, Radha M. Golla, and Guangshun Wang\*

*Department of Pathology and Microbiology, College of Medicine, University of Nebraska Medical Center, 985900 Nebraska Medical Center, Omaha, NE 68198-5900, USA.*

#### **Contents**

Supporting tables

Supporting figures

## Supporting Tables

**Table S1. Correlation between hemolysis and HPLC retention time of the designed LL-37 peptides<sup>1</sup>**

| Peptide  | Hemolysis% at 220 $\mu$ M | HPLC retention time (min) |
|----------|---------------------------|---------------------------|
| 17mF-W   | 7.1                       | 10.535                    |
| 17W2     | 8.0                       | 10.452                    |
| 17tF-W   | 12.1                      | 11.108                    |
| 17B-tF   | 30.2                      | 11.621                    |
| 17tF2    | 32.5                      | 11.625                    |
| 17BIPHE2 | 61.5                      | 11.725                    |

<sup>1</sup>It is evident that there is a logarithmic correlation between hemolysis and peptide HPLC retention time. The longer the retention time, the more hemolytic the peptide.

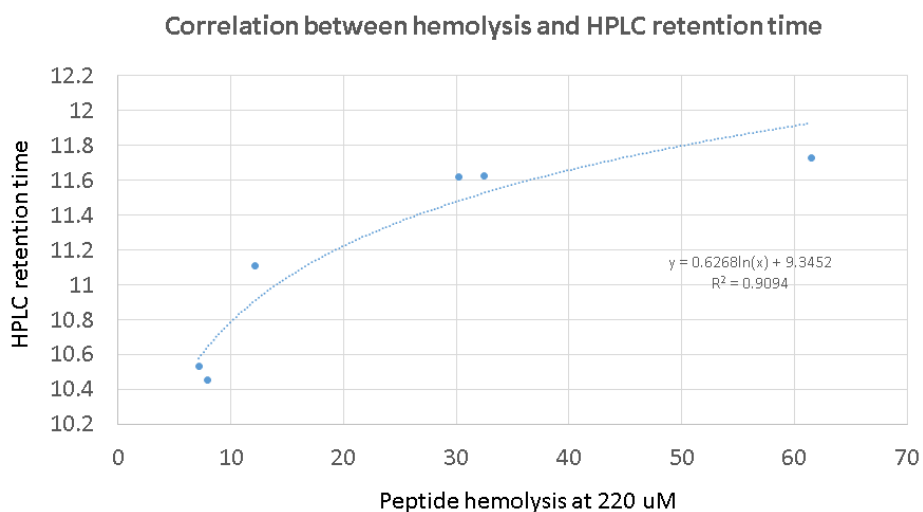

**Table S2. Toxic effects (LC<sub>50</sub> in  $\mu$ M) of 17tF-W and 17BIPHE2 on other human cell lines<sup>1</sup>**

| <b>Peptide</b> | <b>HEK293</b> | <b>HaCaT</b> | <b>THP-1</b> |
|----------------|---------------|--------------|--------------|
| 17tF-W         | >25           | >25          | >12.5        |
| 17BIPHE2       | >25           | >25          | >12.5        |

<sup>1</sup>Cytotoxicity was evaluated by the XTT assays as described [74].

## Supporting Figures

**Figure S1: Evidence for high purity of the peptides. All the peptides show a single major peak detected at 220 nm by UV. The retention time for each peak is labeled (see methods).**

### 17tF-W

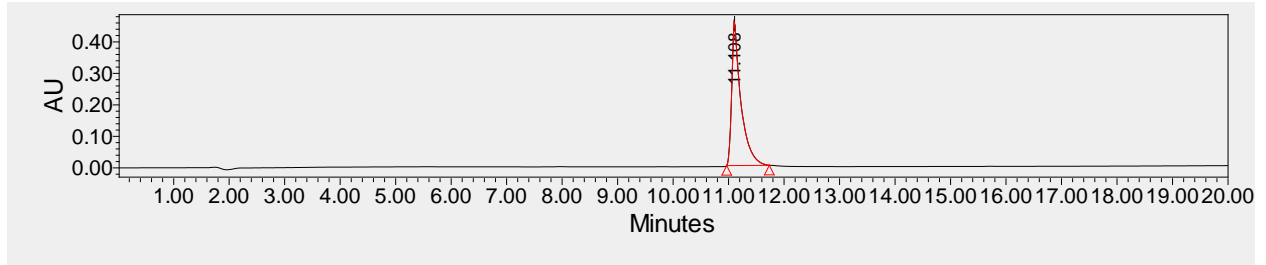

### 17mF-W

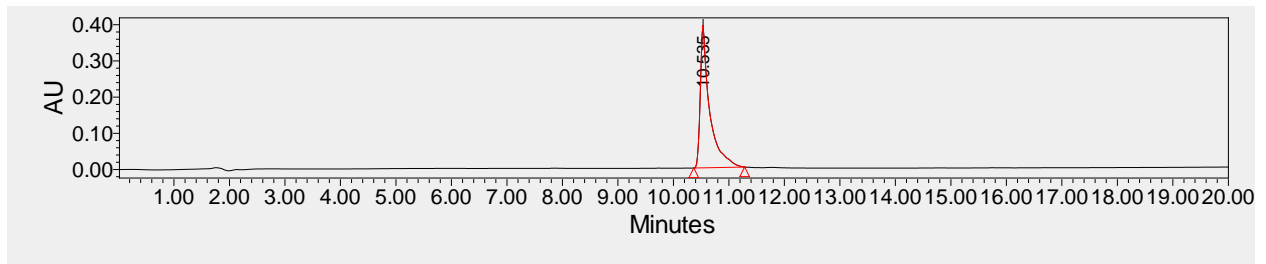

### 17W2

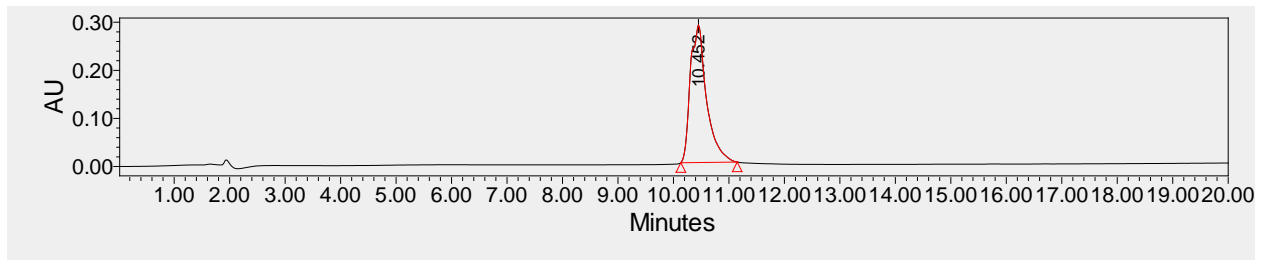

### 17B-tF

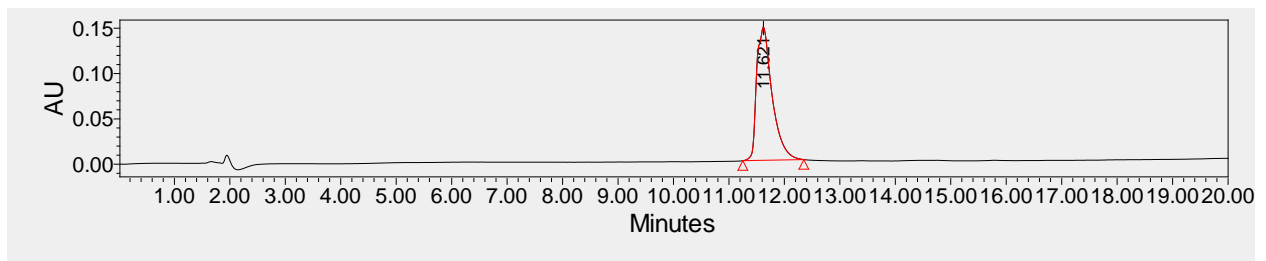

**17tF2**

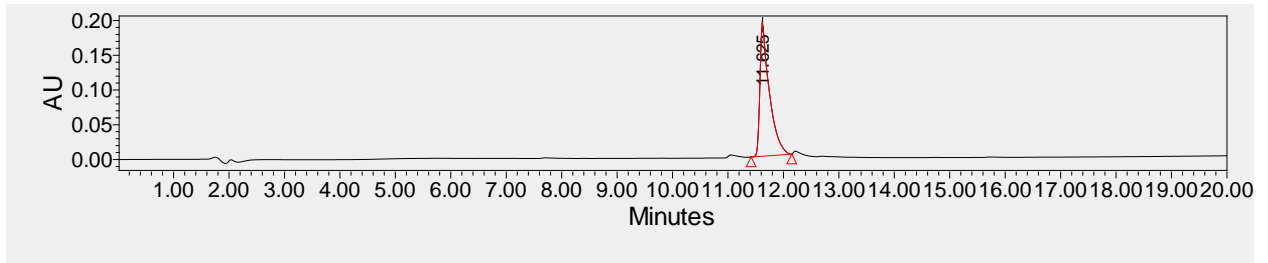

**17BIPHE2**

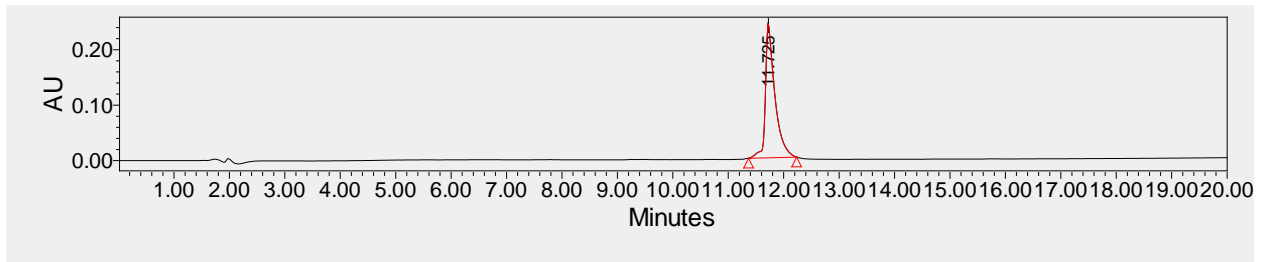

Figure S2: The *S. aureus* USA300 killing kinetics of Group 2 peptides at 3.1  $\mu$ M.

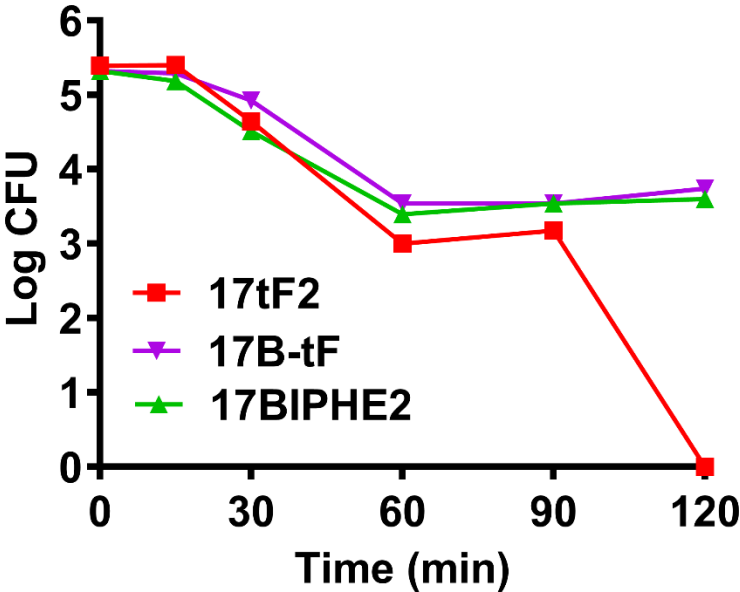

**Figure S3: LL-37 based designer peptides to the action of proteases analyzed by SDS-PAGE.**

(A) Peptide bands of 17BIPHE2 (~2 kD) after incubation with chymotrypsin (C), trypsin (T), *S. aureus* protease V8 (V), or fungal proteinase K (K) for 0 and 24 h. 17BIPHE2 was degraded only by trypsin (lane 5), M is protein marker. (B) SDS-PAGE of peptides 17tF2 and 17B-tF after 24 h digestion by the same four proteases in panel A. (C) SDS-PAGE of peptides 17W2 and 17BIPHE2 after 24 h digestion by the same four proteases in panel A at 37°C. In both panels (B) and (C), lanes 1,6: control peptide; 2,7: chymotrypsin; 3,8: Trypsin; 4,9: V8 protease; 5,10: proteinase K.

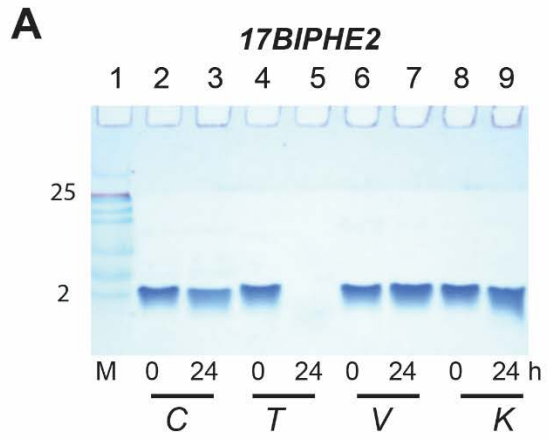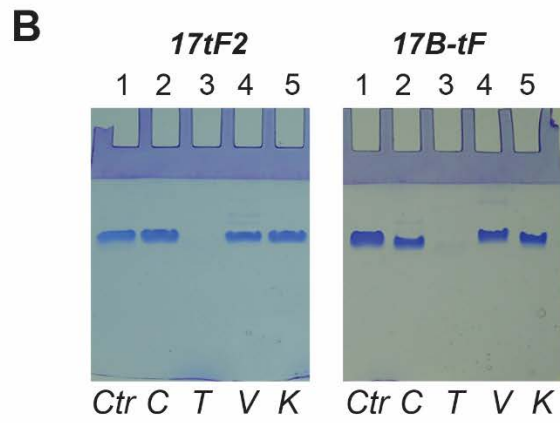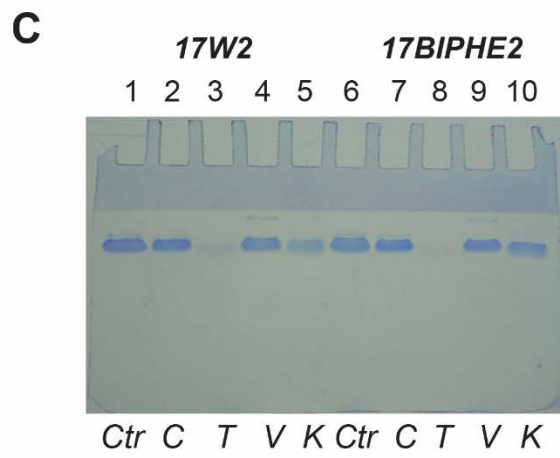



**Fig. S4. Comparison of membrane permeation of *A. baumannii* by the LL-37 designer peptides at 3.1  $\mu$ M.** Propidium iodide is used as an indicator dye. RFU = Relative Fluorescence Unit.

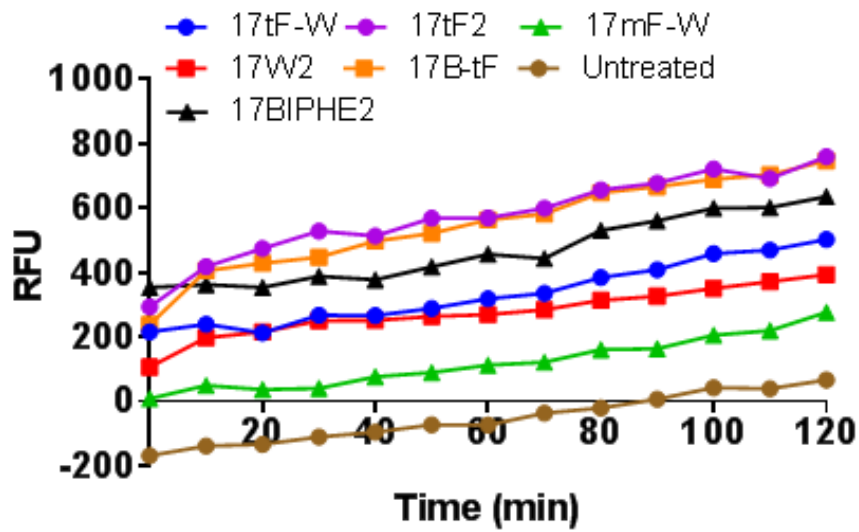

**Fig. S5. Membrane permeation of *K. pneumoniae* by the LL-37 designer peptides at 3.1  $\mu$ M.** Propidium iodide is used as an indicator dye. RFU = Relative Fluorescence Unit.

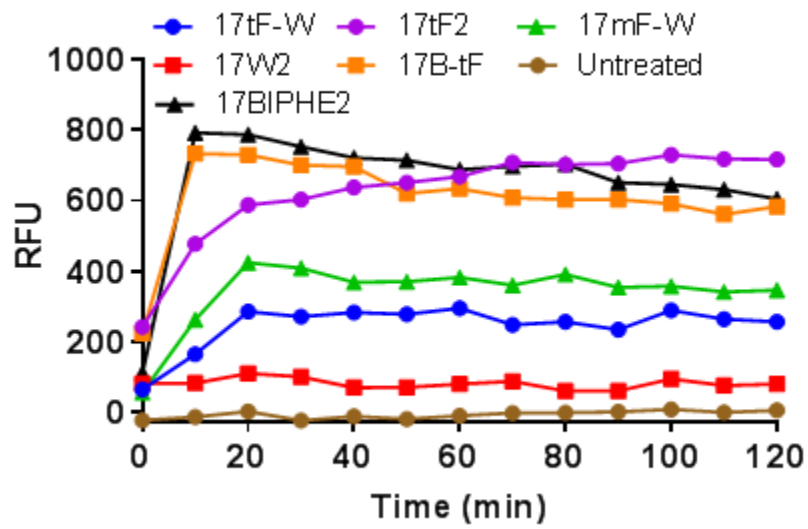

Supplement: NIHMS1535298-supplement-1.pdf [file NIHMS1535298-supplement-1.pdf]
